# Supplementary material
Source: ML conference proceedings conference paper supplement (https://openreview.net/forum?id=tF_iDkYA_Z5)
Supplement: supplementary_material [file attachment]

| Method                 | Income                              | Marital                             | Education                           | Average                             | $\Delta m\%$ | MR          |
|------------------------|-------------------------------------|-------------------------------------|-------------------------------------|-------------------------------------|--------------|-------------|
| Single-task            | 0.9454 $\pm$ 0.0003                 | 0.9817 $\pm$ 0.0005                 | <u>0.8875<math>\pm</math>0.0010</u> | 0.9382 $\pm$ 0.0006                 | 0.00         | 4.33        |
| Uniform scaling        | 0.9407 $\pm$ 0.0007                 | 0.9763 $\pm$ 0.0013                 | 0.8829 $\pm$ 0.0008                 | 0.9333 $\pm$ 0.0009                 | 0.52         | 13.00       |
| GradNorm               | 0.9435 $\pm$ 0.0007                 | 0.9829 $\pm$ 0.0012                 | 0.8873 $\pm$ 0.0006                 | 0.9379 $\pm$ 0.0008                 | 0.03         | 6.00        |
| PCGrad                 | 0.9428 $\pm$ 0.0010                 | 0.9812 $\pm$ 0.0014                 | 0.8856 $\pm$ 0.0006                 | 0.9365 $\pm$ 0.0010                 | 0.18         | 11.00       |
| GradVac                | 0.9436 $\pm$ 0.0008                 | 0.9798 $\pm$ 0.0015                 | 0.8856 $\pm$ 0.0012                 | 0.9363 $\pm$ 0.0012                 | 0.20         | 10.33       |
| MGDA                   | <b>0.9460<math>\pm</math>0.0005</b> | 0.9833 $\pm$ 0.0008                 | 0.8870 $\pm$ 0.0007                 | <u>0.9388<math>\pm</math>0.0006</u> | <u>-0.06</u> | <u>3.00</u> |
| CAGrad                 | 0.9444 $\pm$ 0.0009                 | 0.9820 $\pm$ 0.0015                 | 0.8863 $\pm$ 0.0009                 | 0.9376 $\pm$ 0.0011                 | 0.07         | 7.00        |
| IMTL-G                 | 0.9443 $\pm$ 0.0010                 | 0.9826 $\pm$ 0.0015                 | 0.8864 $\pm$ 0.0009                 | 0.9378 $\pm$ 0.0011                 | 0.05         | 6.33        |
| GradOPS( $\alpha=0$ )  | 0.9436 $\pm$ 0.0009                 | 0.9817 $\pm$ 0.0015                 | 0.8861 $\pm$ 0.0012                 | 0.9371 $\pm$ 0.0012                 | 0.12         | 9.33        |
| GradOPS( $\alpha=2$ )  | 0.9432 $\pm$ 0.0013                 | 0.9769 $\pm$ 0.0015                 | 0.8864 $\pm$ 0.0012                 | 0.9355 $\pm$ 0.0013                 | 0.28         | 10.33       |
| GradOPS( $\alpha=-1$ ) | 0.9443 $\pm$ 0.0006                 | 0.9832 $\pm$ 0.0006                 | 0.8866 $\pm$ 0.0006                 | 0.9380 $\pm$ 0.0006                 | 0.02         | 5.67        |
| GradOPS( $\alpha=-2$ ) | 0.9453 $\pm$ 0.0008                 | <u>0.9837<math>\pm</math>0.0005</u> | 0.8871 $\pm$ 0.0008                 | 0.9387 $\pm$ 0.0007                 | -0.05        | 3.33        |
| GradOPS( $\alpha=-3$ ) | <u>0.9459<math>\pm</math>0.0004</u> | <b>0.9854<math>\pm</math>0.0007</b> | <b>0.8876<math>\pm</math>0.0002</b> | <b>0.9396<math>\pm</math>0.0005</b> | <b>-0.15</b> | <b>1.33</b> |

Table 1: Complete experiment results (mean and standard deviation) on UCI Census-income dataset. The best scores are shown in bold and the second-best scores are underlined. Methods that achieved significant improvements over Single-task results are highlighted with grey background (we use a significance level of 0.05).
